# Supplementary material for: Insights on the Functional Impact of MicroRNAs Present in Autism-Associated Copy Number Variants
Source: PLoS One. 2013 Feb 25;8(2):e56781. doi: 10.1371/journal.pone.0056781 (PMC3581547; doi:10.1371/journal.pone.0056781)
Supplement: Table S2 — Functional annotation of the 708 genes associated with autism until now. (XLSX) [file pone.0056781.s002.xlsx]

## Sheet: Data S2
Functional annotation of the 708 genes associated with autism.
GO Category	Ratio of Enrichment (R)	adj P-value
Biological Process
Transmission of nerve impulse – (GO:0019226)	6.7	2.56 x 10-60
Synaptic transmission – (GO:0007268)	7.07	2.11 x 10-57
Cell-cell signaling – (GO:0007267)	4.75	8.62 x 10-54
Behavior – (GO:0007610)	5.49	1.63 x 10-47
Nervous System Development – (GO:0007399)	3.27	5.57 x 10-36
System process – (GO:0003008)	2.7	2.51 x 10-35
Regulation of system process – (GO:0044057)	5.94	1.44 x 10-33
Neurological system process – (GO:0050877)	2.91	7.46 x 10-33
Regulation of neurological system process – (GO:0031644)	8.71	1.15 x 10-31
Multicellular organismal process – (GO:0032501)	1.76	1.37 x 10-31
Molecular Function
Amine binding – (GO:0043176)	8.25	1.02 x 10-21
G-protein coupled amine receptor activity – (GO:0008227)	12.47	8.01 x 10-16
Extracellular ligand-gated ion channel activity – (GO:0005230)	8.66	8.01 x 10-16
Receptor activity – (GO:0004872)	1.95	1.38 x 10-12
Signal transducer activity – (GO:0004871)	1.79	4.15 x 10-12
Molecular Transducer Activity – (GO:0060089)	1.79	4.15 x 10-12
Ligand-gated channel Activity – (GO:0022834)	5.36	1.04 x 10-11
Protein binding – (GO:0005515)	1.27	1.04 x 10-11
Neurotransmitter binding – (GO:0042165)	7.04	1.04 x 10-11
Ligand-gated ion channel activity – (GO:0015276)	5.36	1.04 x 10-11
Cellular Compounds
Plasma membrane part – (GO:0044459)	2.51	1.39 x 10-33
Synapse – (GO:0045202)	5.17	4.75 x 10-29
Neuron projection – (GO:0043005)	5.29	3.84 x 10-28
Synapse part – (GO:0044456)	6.02	1.87 x 10-27
Postsynaptic membrane – (GO:0045211)	7.63	1.43 x 10-23
Integral to plasma membrane – (GO:0005887)	2.65	4.92 x 10-23
Intrinsic to plasma membrane – (GO:0031226)	2.62	7.35 x 10-23
Plasma membrane – GO:0005886)	1.75	9.76 x 10-22
Cell projection – (GO:0042995)	3.27	4.34 x 10-21
Axon – (GO:0030424)	6.28	2.68 x 10-18
KEGG Pathway
Neuroactive ligand-receptor interaction – 04080	18.35	3.62 x 10-67
Calcium signaling pathway – 04020	13.19	1.06 x 10-27
Pathways in cancer – 05200	7.31	2.61 x 10-19
Metabolic pathways – 01100	3.66	8.07 x 10-17
MAPK signaling pathway – 04010	7.52	1.09 x 10-16
Cell adhesion molecules (CAMs) – 04514	11.2	2.57 x 10-16
Long term potentiation – 04720	14.91	1.73 x 10-13
Focal adhesion – 04510	7.79	1.84 x 10-13
Dilated cardiomyopathy – 05414	12.05	8.47 x 10-13
Small cell lung cancer – 05222	12.43	2.56 x 10-12
