# Supplementary material for: Insights on the Functional Impact of MicroRNAs Present in Autism-Associated Copy Number Variants
Source: PLoS One. 2013 Feb 25;8(2):e56781. doi: 10.1371/journal.pone.0056781 (PMC3581547; doi:10.1371/journal.pone.0056781)
Supplement: Table S4 — The list of genes present in each category of Figure 4: Intersection analysis of the 326 genes targeted by miRNAs present in CNVs. (XLSX) [file pone.0056781.s004.xlsx]

## Sheet: Data S4
Category	List of genes
Exclusive targets of deleted miRNAs (A)	RTN4, FHIT, CCK, PAX6, OXTR, NETO1, TSPAN12, HOXA1, CASP3, TDO2, NPAS2, CDH9, MAZ, ROBO1, HTR5A, CNTNAP5, NPL, ESR1, DUSP22, MBD4, NXN, ADM, PON1, VIP, TYR, GRM8, C15orf43, CCDC148, HIRA, ROBO4, CASK, EXT1, ARHGAP15, SHANK3, HLA-B
Exclusive targets of duplicated miRNAs (B)	NRP2, FGFR1, FGD1, COBL, GFAP, RAI1, DRD1, SCN3A, GRIK1, MLPH, ARNT2, NBEA, SLC7A5, CCDC64, ALOX5AP, NFIL3, HTR3B, CABLES1, PIK3CG, STX1A, STS, MPP2, PLD5, PCDH10, GABRA5, ABCB1, ARID1B, MBD3, ADIPOQ, CHRM5, NPY, MAB21L1
Exclusive targets of miRNAs that show combination (C)	TSPO, CYP11B1, F13A1, ATP10A, RNF213, TGFB1, IL10, NOS2A, WNT2, IMMP2L, TOR3A, PECR, CASP9, SND1, IFNG, ANKRD11, DAO, STK39, GABRG1, TUB, GABRG2, AR, NDNL2, RAB39B, FMR1, MDGA2, ESR2, NRXN1, FOSB, MBD1, MARK1, ZSWIM5, HES1, XPC, RFC1, MTF1, HEPACAM, GTF2I, RYR3, FOXG1, HSD11B1, CARTPT, ING3, ACHE, CCL2, PCDH20, DIAPH3, ASTN2, ST8SIA2, ITGB3, ATP6V0C, LAMB4, PRUNE2, CHD7, SYN1, PDE1C, CNR1, PER2, …
A n B n C	MEF2C, CAMTA1, ADCY1, SCN1A, ERBB4, FBXO40, OPRK1, NFKB1, PTEN, RIMS3, SEMA5A, BDNF, SLC1A2, NIPBL, BCL2, PDE4A, PAFAH1B1, DCX, NXPH1, KCND2, GABRA4, SUCLG2, PCDH11X, LRRC1, AFF4, PCDH9, WNK3, PTPRT, GRIA3, PCDH17, PCDH19, DLX1, SYNE1, TSC1, GRIA2, FAM120C, MAP2, TFPI, ZNF711, CHRNB2, CNTN4, MCC, CNTN3, TBL1X
A n B - A n B n C	IQCB1, SLC9A6, GABRB3, ALDH5A1, NLGN2, ANPEP, NIPA1, SMO, DCUN1D1, SLC30A4, APBA2, TLK2, NFIA, HTR2A
A n C - A n B n C	PLXNA4, SLC6A1, STK38, HOXD13, FOXO1, AQP4, COX5A, SDC2, CTTNBP2, ASPA, SLC1A3, CD44, GRIN2B, EIF1AY, CNTNAP2, DLG3, MKL2, SLC1A1, DPP4, KHDRBS2, ACADL, LHFPL3, EP300, STXBP6, XIRP2, GRM7, VEGFA, JMJD1C, CUX2, TPH2, NGF, BTAF1, PTCHD1, USP9Y, ADORA2A, NPY2R, TAC1, POMC, WT1, ARX, C3orf58, RB1CC1, ITGAV, TBC1D4, AUTS2, EGF, GAD1, NDUFA5, RFX4, MAOB, YWHAB, IGF1, EN2, SHANK2, DOCK3, ATRX, DLX2, PPI…
B n C - A n B n C	ACADSB, PTGS2, GRIK2, FIGNL1, GJA1, CALB1, ATP2B2, MTHFR, RASGRP1, LRRTM2, MAPT, GPC6, IL1B, ROBO2, CAT, GALNT13, DISC1, ABCA13, KCNMA1, CXorf36, GABRA3, PTPRZ1, NF1, MECP2, GARS, MACROD2, TIFA, DCTN5, PCDH8, AFF2, UBE2H, TSN, HGF, DAPK1, PTPN11, KDR, SLC25A12, ADRB2, ZNF214, CYFIP1, TSGA14, SST, PDZD4
