# Supplementary material for: Insights on the Functional Impact of MicroRNAs Present in Autism-Associated Copy Number Variants
Source: PLoS One. 2013 Feb 25;8(2):e56781. doi: 10.1371/journal.pone.0056781 (PMC3581547; doi:10.1371/journal.pone.0056781)
Supplement: Table S5 — The list of target genes of the top 10 hub microRNAs identified from the microRNA-target gene network in autism. (XLS) [file pone.0056781.s005.xls]

## Sheet: Data S5
MicroRNA	Degree	Target genes
hsa-miR-590-3p	91	ABCA13, ACADL, ACADSB, ACHE, ADRB2, AFF4, ANKRD11, APAF1, AQP4, ASPA, ATP10A, ATRX, AUTS2, AVPR1A, BCL2, BTAF1, C3orf58, CALB1, CAMTA1, CD44, CNTN3, CNTN4, CNTNAP2, CXorf36, CYFIP1, DIAPH3, DLX1, DLX5, DOCK4, DPYD, EP300, ERBB4, FEZF2, FOXP1, GABRA4, GABRG1, GAD1, GALNT13, GJA1, GRIA2, GRIA3, HLA-A, HOXB2, IFNG, IGF1, ITGAV, JMJD1C, KCND2, KCNMA1, LAMB4, LRRC1, LRRTM2, MARK1, MBD1, MCC, MCF2, MEC…
hsa-miR-944	50	PTGS2, CCDC148, HIRA, HOXD13, AQP4, CASK, ARHGAP15, IMMP2L, TYR, GPC6, C15orf43, ROBO4, STK39, TLK2, CAT, GABRG1, PIK3CG, KHDRBS2, NDNL2, MDGA2, WNK3, ARID1B, ESR2, UBE2H, ACADL, GRM8, GRM7, VEGFA, JMJD1C, EXT1, VIP, DRD1, TAC1, NIPBL, LRRTM2, RB1CC1, ITGAV, DCX, GABRA4, RFX4, NF1, GRIA3, EN2, SHANK3, FOXP1, PTPN11, ATRX, DLX1, GRIA2, HTR2A
hsa-miR-570	46	ATRX, AVPR1A, CAMTA1, CCK, CDH9, CTTNBP2, DCUN1D1, DCX, DPP4, DUSP22, EIF1AY, ERBB4, ESR1, FAM120C, FOXO1, GRIA3, GRM7, HLA-B, HOXD13, HTR2C, IQCB1, KHDRBS2, MAP2, MAZ, MKL2, NETO1, NIPA1, PAFAH1B1, PCDH11X, PCDH17, PCDH19, PPIG, PTEN, RIMS3, RTN4, SCN1A, SDC2, SLC1A2, SLC9A6, STXBP6, TAC1, TBL1X, TFPI, TM4SF20, XIRP2, ZNF385B
hsa-miR-34a	32	PNOC, C3orf58, GABRA3, LRRTM2, PLN, DLG3, DPYD, TSN, CALB1, FOXP1, RIMS3, KCNMA1, ERBB4, MET, FOXO1, NFKB1, PTEN, HES1, NOS2A, SYNE1, PPIG, CD44, SND1, GRM7, BCL2, VEGFA, IFNG, IL1B, STK39, APC, BDNF, MECP2
hsa-miR-124	31	HES1, PTPRC, BDNF, CCL2, SLC1A3, LASP1, SUCLG2, LRRC1, FOXG1, FMR1, SYNE1, TUB, ACADSB, RFX4, STK38, PTPRZ1, FIGNL1, GRIA3, PCDH8, SHANK2, RNF213, DAPK1, TOR3A, HDAC4, ASPA, GRIA2, C3orf58, RYR3, DLX5, RB1CC1, DPP4
hsa-miR-548f	31	PTGS2, GRIK2, GJA1, ASTN2, CALB1, PTEN, IL10, SDC2, SLC1A2, NIPBL, SLC1A3, ITGAV, EIF1AY, ANKRD11, ROBO2, MKL2, SLC1A1, GABRG1, GABRA4, DLGAP2, MACROD2, AFF2, ACADL, REEP3, MARK1, HDAC4, MAP2, MCC, CNTN4, CNTN3, NGF
hsa-miR-429	28	PLXNA4, SLC6A1, ERBB4, NTF3, CYP11B1, PTPRZ1, NPY2R, YWHAB, TIFA, KDR, SEMA5A, IMMP2L, SLC1A2, FAM120C, MAP2, ZNF711, DCX, TSGA14, SNAP25, NXPH1, MEST, WNT2, EP300, MET, CD79A, EGF, PTEN, TGFB1
hsa-miR-200b	23	PLXNA4, SLC6A1, ERBB4, NTF3, CYP11B1, PTPRZ1, NPY2R, YWHAB, TIFA, KDR, DOCK4, SEMA5A, IMMP2L, SLC1A2, FAM120C, MAP2, ZNF711, DCX, TSGA14, DDX53, SNAP25, NXPH1, MEST
hsa-miR-195	23	FGFR1, DRD1, PCDH9, WNK3, PCDH17, MTHFR, SLC1A2, ADRB2, SLC30A4, CYFIP1, PAFAH1B1, CNTN3, NXPH1, HTR2A, BDNF, NPY, BCL2, MECP2, GARS, PCDH8, NFKB1, PTEN, SST
hsa-miR-497	23	KCNMA1, FGFR1, STX1A, GFAP, DRD1, SLC9A6, PCDH9, WNK3, PCDH17, MTHFR, SLC1A2, ADRB2, TSC1, LRRTM2, SLC30A4, CYFIP1, PAFAH1B1, CNTN3, NXPH1, HTR2A, SYNE1, BCL2, PTEN
